# Supplementary material
Source: PubMed Central journal article supplement (PMC4636983)
Supplement: NIHMS689729-supplement-Supp_TableS2.pdf [file NIHMS689729-supplement-Supp_TableS2.pdf]

**Table S2. Oligonucleotide Primers used for the Mixed Culture Experiments.**

| <b>Name</b>        | <b>Sequence (5' -&gt; 3')</b> | <b>Application</b>                | <b>Paired Primer</b> |
|--------------------|-------------------------------|-----------------------------------|----------------------|
| <sup>a</sup> Erm L | TCTGACGATAAGTTGAATAGATGAC     | Chemostat/Constructions/Rat model | -                    |
| <sup>b</sup> Erm R | TTGTTTCAAATGGGTCAATC          | Chemostat/Constructions/Rat model | -                    |
| MX0804P7UPFG       | TATGGTGACGCTCTACAGC           | Chemostat/Rat model               | a                    |
| MU0022P7UPFG       | AGACCCTAGAATTGATGGATGAAGG     | Chemostat                         | a                    |
| MU0023P7UPFG       | TTGCATCAATATGCTATTCTTGGCT     | Chemostat                         | a                    |
| MU0898P7UPFG       | GTAACCAAGCAAAAAGCG            | Chemostat                         | a                    |
| MU1020P7UPFG       | AAGTTGAGGTATTAGAGATAGGTCG     | Chemostat                         | b                    |
| MU1591P7UPFG       | TAAGAAATAATCAATCGC            | Chemostat                         | b                    |
| MU1592P7UPFG       | TGGTCGTAACCGTTC               | Chemostat                         | b                    |
| MU1592P8DNRH       | GGCAACTAAAGCAGTC              | Rat model                         | a                    |
| MU1593P7UPFG       | ACATATCATCAATACCGGTCG         | Chemostat                         | a                    |
| MU0121P7UPFG       | GGTATCATCGGCAAGCACAAGG        | Rat model                         | a                    |
| MU0123P7UPFG       | TGACTATAAGGCCATTTGTTTCATAC    | Rat model                         | a                    |
| MU0124P7UPFG       | GGCAGAAGCATCGGCTCAAGACTTG     | Rat model                         | a                    |
| MU0125P7UPFG       | GGTTTCTTGGTAGCCTTGGTCTTC      | Rat model                         | a                    |
| MU1450P7UPFG       | GCTTTTCTTGTCTATTATCCATTC      | Rat model                         | a                    |

**Functional profiling in *Streptococcus mutans*: construction and examination of a genomic collection of gene deletion mutants**
